# Supplementary material for: Synthesis of Ferulenol by Engineered Escherichia coli: Structural Elucidation by Using the In Silico Tools
Source: MDPI journal article supplement (doi:10.3390/molecules26206264), 2021-10-16

## Supplementary Materials

**Figure S1:** The insertion of AtaPT in MCS-1 of pCDFDuet-1 vector

```
CGGGAATCGAATCGCGAGTATACGACTCACTATAGGGGAATTGTGAGCGGATAACAATCCC
CCTCTAGAAATAATTTTGTTTAACTTTAAGAAGGAGATATACCATGGGCAGCAGCCCATCAC
6XHIS RBS 6XHIS
CATCATCACCACAGCCAGGATCCGATGCTCCCCCATCAGACAGCAAAGATCCCCGGCCCT
BamHI Start codon
GGCAGATCCTGAGCCAGGCGCTCGGCTTCCCCAATTACGACCAGGAACTGTGGTGGCAAAA
CACGGCGGAGACGCTCAACCGCGTCCTCGAACAGTGCGATTACAGCGTGCATCTGCAGTAC
AAGTACCTCGCCTTCTACCACAAATACATCCTCCCCAGTCTGGGCCCCCTTCCGCCGCCCGG
GCGTCGAGCCCGAGTACATCAGCGGCCTCTCCACGGCGGCCATCCGCTGGAGATCAGCG
TCAAGATCGACAAGTCCAAAACGATCTGCCGGCTCGGATTGCAGGCGATCGGGCCGCTCGC
CGGCACCGCGCGCGACCCGCTCAACAGCTTCGGCGACCGTGAACTCTCAAGAATCTCGCG
ACGCTGCTGCCGCACGTGCACCTGCGCTTGTTTCGACCACTTCAACGCGCAGGTCGGGCTCG
ACCGCGCGCAGTGCGCCGTCGCCACCACCAAGCTCATCAAGGAGAGCCACAACATCGTCTG
CACGTCGCTCGACCTCAAAGACGGCGAGGTCATTCCCAAGGTCTACTTCTCCACCATCCCG
AAGGGGCTCGTCACCGAAACGCCGCTGTTTCGACCTCACCTTTGCGGCGATCGAGCAGATGG
AGGTATACCACAAAGACGCGCCGCTGCGGACGGCGCTGTCGTCGCTGAAGGACTTTTTGCG
CCCGCGCGTGCCACCGACGCCAGCATTACCCCGCCCCTGACCGGCCTCATCGGCGTCGAT
TGTATCGACCCCATGCTGTCCCGGCTGAAGGTGTACCTGGCCACCTTTCGCATGGACCTGT
CCTTGATCCGCGACTACTGGACGCTGGGCGGCTTGCTGACGGACGCGGGCACGATGAAAGG
CCTGGAGATGGTGGAGACGCTGGCTAAGACGCTGAAGCTGGGCGACGAGGCCTGCGAGACG
CTGGACGCGGAGCGTCTGCCGTTTGGAATCAACTATGCGATGAAGCCGGGGACGGCGGAGT
TGGCGCCGCCCCAGATCTACTTCCCCTGCTGGGCATTAATGACGGGTTCATTGCGGATGC
TCTAGTTGAATTCTTCCAGTACATGGGCTGGGAGGACCAGGCGAATCGGTACAAGGATGAA
CTGAAGGCGAAATTTCCCAATGTGGATATCTCGCAGACCAAGAACGTCCATCGCTGGCTGG
GAGTGGCGTACTCCGAGACCAAGGGCCGTCGATGAACATTTACTACGATGTGGTTGCGGG
AAATGTCGCACGTGTGTGAGCGGCGCGC
Stop codon
NotI
```

**Figure S2:** The insertion of CstDXS in MCS-2 of pCDFDuet-1 vector

**RBS**

*KpnI*      Start codon

TCTTAGTATATTAGTTAAGTATAAGA**AAGGAG**ATATACATATGGCAGATCTCAATTGGATAT  
 CGGCCGGCCAGCCGATCGCTGACGTCGGT**ACC**ATGGCATCACTTTTCAGAAAGTGCAGAGTA  
 TCACTCAAACAGACCAGCAACACCTCTACTGGACACCATCAACTTTCCAATTCATATGAAA  
 AATCTATCAATCAAGGAAGTGAAGCAGCTAGCAGAAGAGCTCCGTTTCAGATGTTATTTTCA  
 ATGTTTCTAAAAGTGGGGGTCAGTTGGGATCAAGCCTTGGTGTGTTGAACTTACTGTGGC  
 TCTTCACTATATTTTCAATACTCCTCAAGATAAGATTCTGTGGGATGTTGGCCATCAGTCT  
 TACCCCCACAAAATCCTTACCGGGAGAAGAGACAGGATGCGCACAAATAGACAGACTAATG  
 GGCTTTCTGGGTTTACCAAACGAGCTGAGAGCGAACATGATTGCTTTGGCACTGGCCATAG  
 CTCTACCACTATTTCTGCAGGCTTGGGAATGGCAGTGGGGAGAGATTTAAAAGAAAGAAAG  
 AACAAATGTTGTGGCTGTTATAGGAGACGGAGCCATGACAGCAGGACAAGCTTATGAAGCTA  
 TGAACAATGCAGGATACTTGGACTCCGATATGATTGTTATTCTCAATGACAACAAACAGGT  
 TTCTTTACCAACTGCTACGCTTGATGGACCAATACCACCTGTGGGAGCTTTGAGCAGTGCT  
 CTTAGCAGGTTGCAATCCAACCGGCCTTTAAGAGAACTAAGAGAGATTGCCAAGGGTGTTA  
 CAAAGCAAATTTGGTGGACAGATGCATGAGTTGGCTGCAAAGGTTGATGAATATGCACGTGG  
 TATGATAAGTGCTTCTGGATCATCTCTTTTTGAAGAGCTTGGTTTGTATTATATTGGTCCA  
 GTTGACGGTCACAATATCGAGGATCTTGTCGATATCCTTAAAGAGGTTAAAAGCACCAAA  
 TCAACTGGGCCAGTCTTGATTTCATGTCGTTACTGAGAAAGGCCGGGGATATCCATATGCTG  
 AGAGAGCCGCAGACAAGTACCACGGAGTAACCAAGTTTGATCCTGCAACCGGGAAGCAATT  
 TAAGTCTGGTGGAAGTACACAGTCGTACACGACATACTTTGCAGAGGCTTTGATTGCAGAA  
 GCAGAAGTGGACAAGGATATTGTCGCAATTCATGCTGCAATGGGAGGAGGAACAGGCTTGA  
 ATCTCTTCCATCGCCGTTTCCCAAATAAATGCTTTGATGTTGGGATAGCAGAGCAGCATGC  
 TGTTACATTTGCTGCTGGATTGGCCTGCGAAGGCCTTAAACCTTTCTGTGCTATCTATTCA  
 TCTTTCATGCAGAGGGCTTACGACCAGGTGGTGCACGATGTGGATTTGCAGAACTTCCTG  
 TAAGATTCGCGATGGATAGAGCTGGCCTCATCGGAGCAGATGGTCCCACACATTGTGGAGC  
 CTTTGATGTTACTTTTCATGGCGTGCCCTCCTAACATGGTGGTGGTGGCTCCTTCTAATGAA  
 GCAGAACTCTTTAACATGGTTGCCACTGCTGCTGCCATAGATGATCGTCCAAGCTGTTTCC  
 GATATCCGAGAGGAAACGGTATCGGTGTTCCNCTGCCNCCTGGAAACAAAGGCATTCCNT  
 TGAGGTTGGAAAAGGAAGGATCTTGATTGAGGGGGAGCGAGTGGCGCTACTGGGATATGGT  
 GCAGCAGTTCAAACTGTCTAGCTGCTGCATCTTTAGTTGAAACCCCGGCTTACGTGTAA  
 CTGTTGCAGATGCTAGATTTTGTAACCATTAGATCAATCTCTGATTCGAAGTCTAGCGAA  
 GTCNCACGAAGTTTTGATTACGGTTGAAGAAGGCTCAATTGGGGGATTTGGATCTCATGTT  
 GCTCATTTTATGGCTCTCAATGGCCTTCTTGATGGCANCCCTAAGTGGCGACCGCTCGTTN  
 TTCCCGATCGATATATTGAGCNCGGATCNC CGGCAGACCAGTTGATAGAGGCAGGTTTAAC  
 NCCATCTCNCATTGCCGCAACAATATTCAACATACTTGGAACAAAAGAGAAGCTCTGCAA  
 ATTATGTCAGCACTCGAGTCTGGT**AAAGAAACCGCTGCTGCGAAATTTGAACGCCAGCACA**  
**TGGACTCG**      *XhoI*      S.Tag

**Figure S3:** Verified insertion of CstDXS (~1992 bp) in pCDFDuet-AtaPT (~5,020 bp) via *Kpn*I and *Xho*I digestion

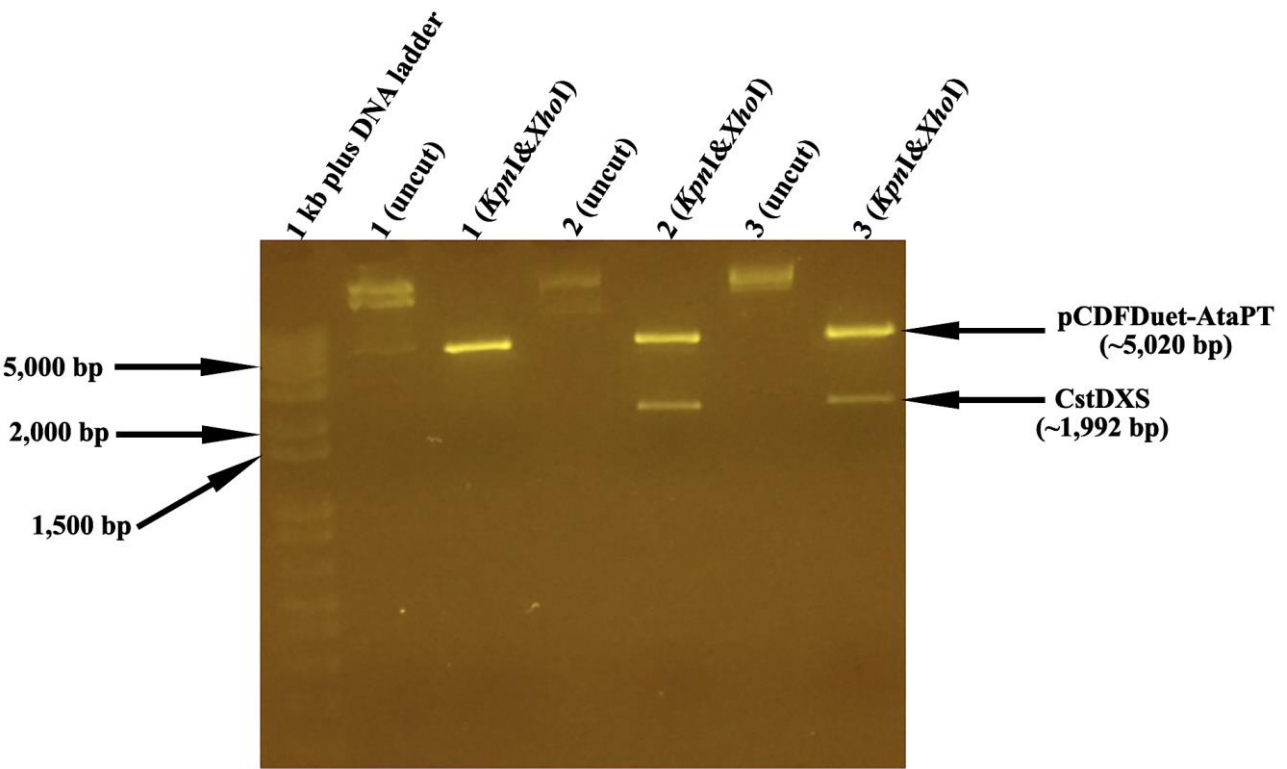

**Figure S4:** The raw mass data for putative ferulenol (2)

| <b>Compound-1</b>                         |                  |
|-------------------------------------------|------------------|
| <b>Molecular ion 365.2120 RT 21.3 min</b> |                  |
| <b>m/z</b>                                | <b>Intensity</b> |
| 96.9611                                   | 128              |
| 120.0216                                  | 132              |
| 161.0249                                  | 400              |
| 174.0305                                  | 436              |
| 187.0397                                  | 580              |
| 200.0827                                  | 172              |
| 213.0559                                  | 656              |
| 214.0597                                  | 308              |
| 227.0714                                  | 604              |
| 228.02792                                 | 1432             |
| 229.02792                                 | 416              |
| 365.2154                                  | 960              |

**Figure S5:** The proposed reaction mechanisms illustrating the various chemical losses present in the MS/MS spectrum of compound-1

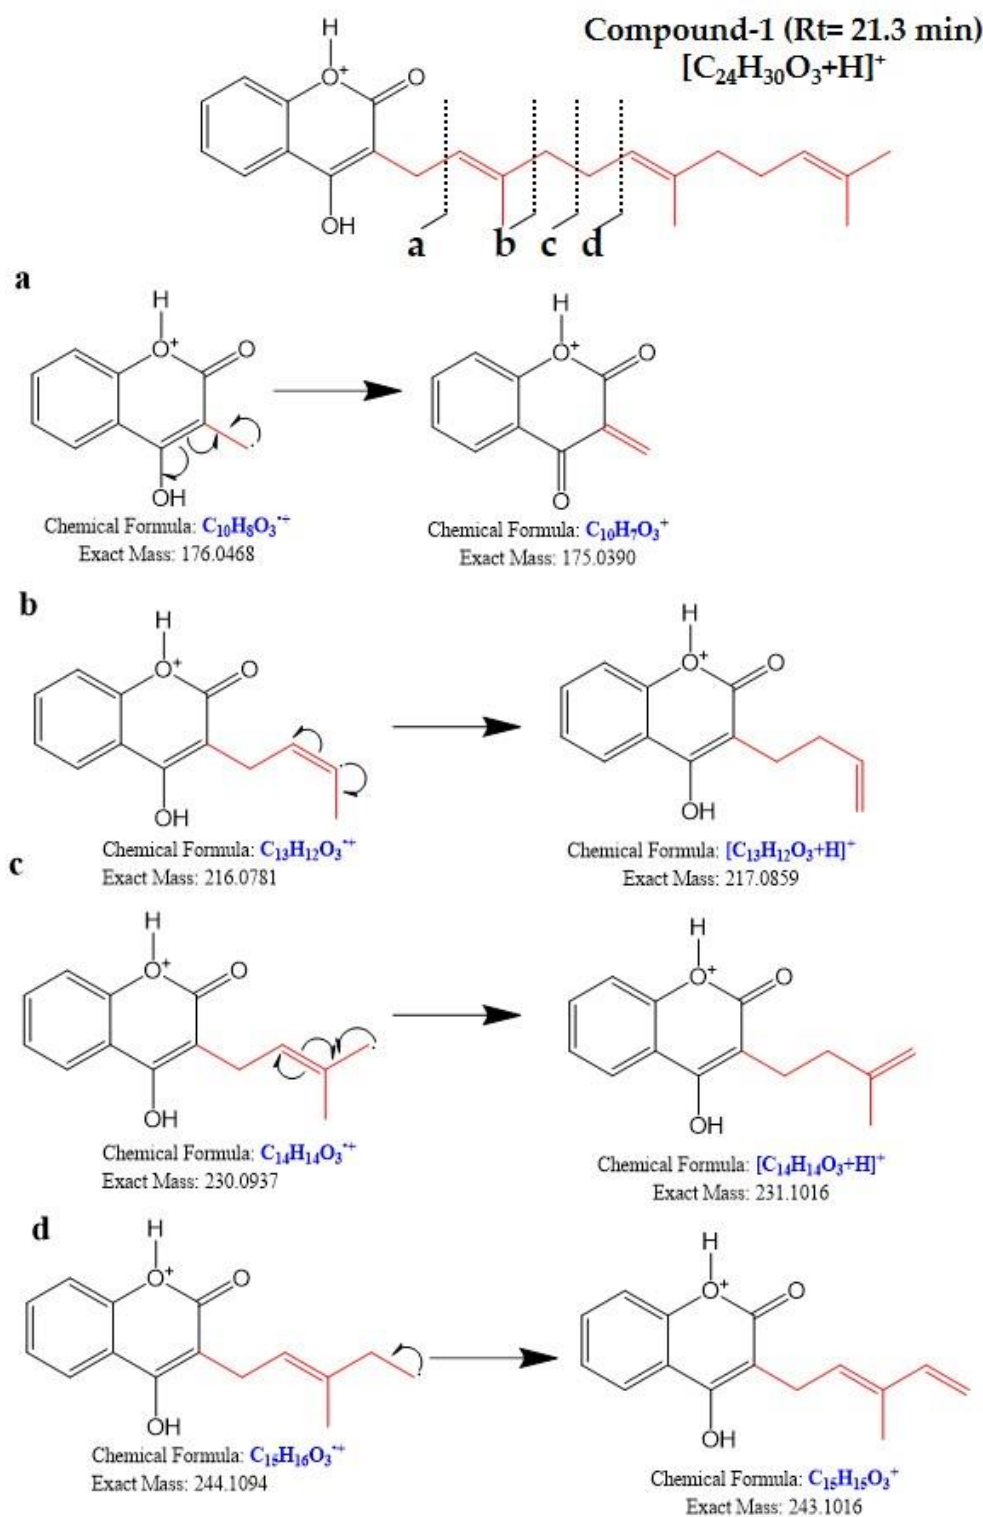

**Figure S6:** The proposed reaction mechanisms illustrating the various chemical losses present in the MS/MS spectrum of compound-2

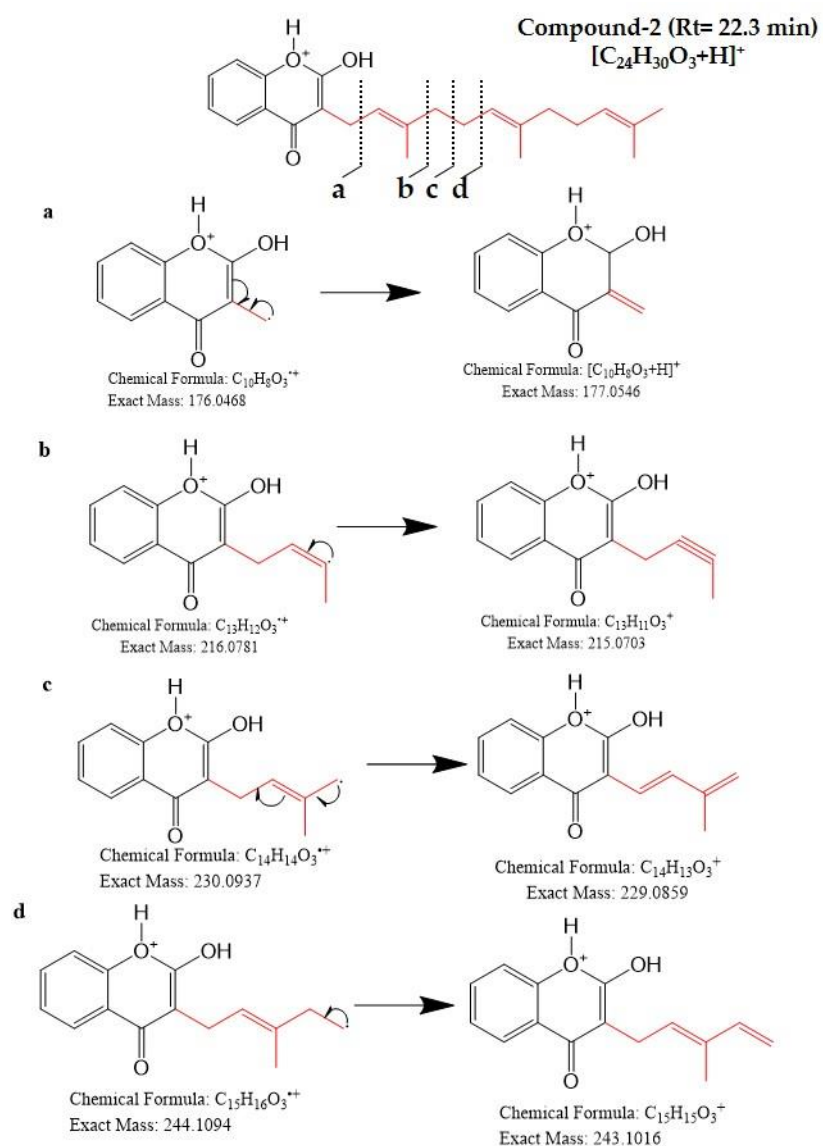

**Figure S7:** Figure S7: The postulated mechanisms underlying the formation of ion  $m/z$  189.05 of compound-1

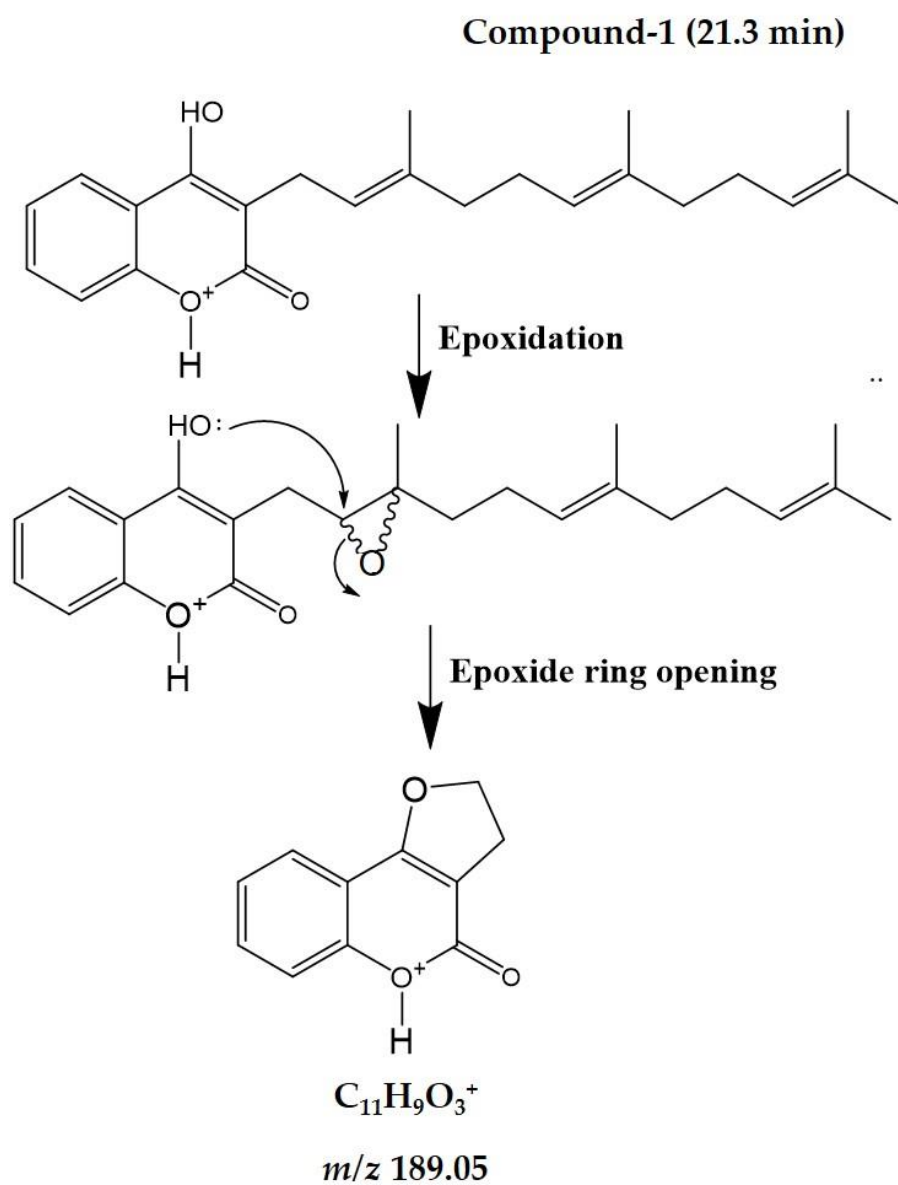

**Figure S8** The postulated mechanisms underlying the formation of ion  $m/z$  189.05 of compound-2

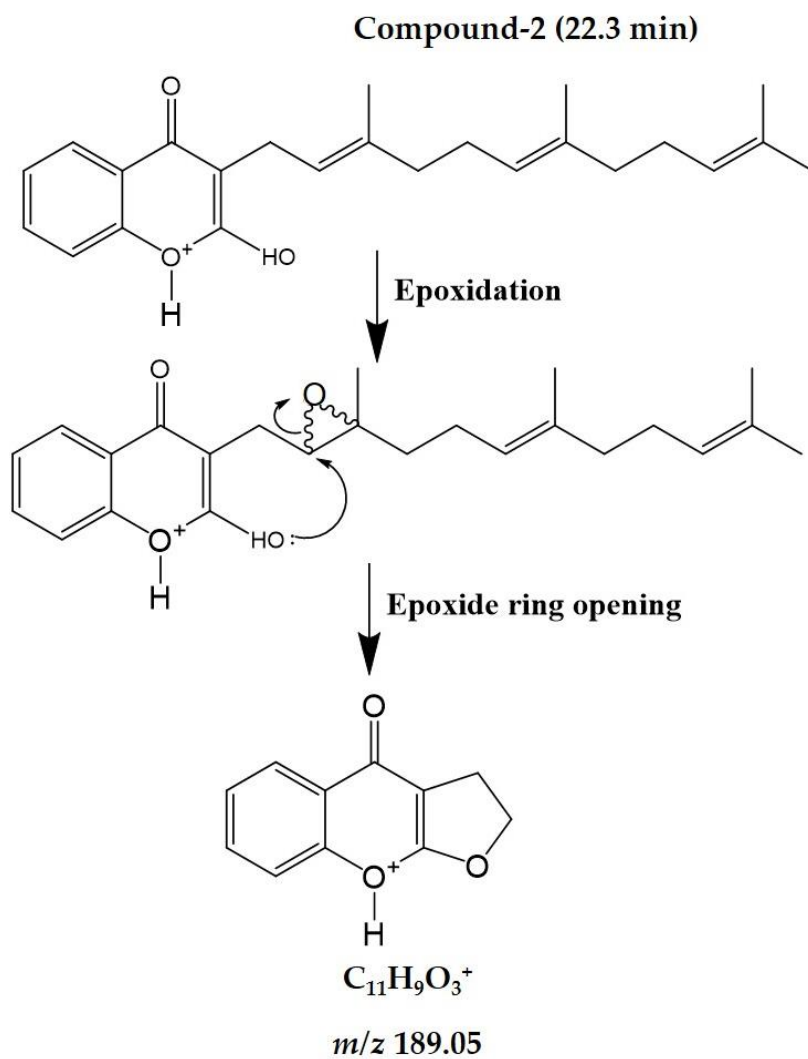

Supplement: s1 [file s1]
